# Supplementary material for: Role of co-expressed APOBEC3F and APOBEC3G in inducing HIV-1 drug resistance
Source: PubMed Central journal article supplement — Heliyon. 2019 Apr 16;5(4):e01498. doi: 10.1016/j.heliyon.2019.e01498 (PMC6475876; doi:10.1016/j.heliyon.2019.e01498), 2019-04-16
Supplement: mmc1.pdf [file mmc1.pdf]

**Supplementary Table S1.** Codon changes in RT.

| Cell Type       | A3         | Drug      | Codon Changes (other than those reported in main text)                                                                                     |
|-----------------|------------|-----------|--------------------------------------------------------------------------------------------------------------------------------------------|
| <b>PROVIRUS</b> |            |           | Codon changes occurred at 3% frequency or higher                                                                                           |
| U87             | -          | -         | G93E, D113N, E122K, R143K, G152E, G155E, E169K, R172K, D185N, D186N, D192N, E194K, E203K, E204K, G213E, E224K, E233K, D237N                |
|                 | -          | 3TC       | G93E, R143K, G152E, G155E, D185N, D186N, E203K, E204K, G213E, E224K, E233K, D237N                                                          |
|                 | -          | Mixed ARV | D17N, G18S, E29K, E36K, E40K, E44K, G45E, G51R, G93K, A98T, G99K, V106I, D110N, G112N, D113N, A114T, D237N                                 |
|                 | A3F/A3G    | -         | D113N, E122K, R143K, G152E, G155E, E169K, R172K, D185N, D186N, D192N, E194K, G196R, R199K, E203K, E204K, R206K, G213E, E224K, E233K, D237N |
|                 | A3F/A3G    | 3TC       | D17N                                                                                                                                       |
|                 | A3F/A3G    | AZT       | G155R                                                                                                                                      |
|                 | A3F/A3G    | Mixed ARV | E122K                                                                                                                                      |
| CEM             | Endogenous | -         | E122K                                                                                                                                      |
|                 | Endogenous | 3TC       | A33T, C38Y, E40K, E44K, E79K, G93K, A98T, D110N, G112S                                                                                     |
|                 | Endogenous | AZT       | E122K                                                                                                                                      |
| CEM-SS          | -          | -         |                                                                                                                                            |
|                 | -          | 3TC       | R211K, A33T, C38Y, E40K, E44K, G45K, G51R, G93K, A98T, G99E, D110N, G112N, D113N                                                           |
|                 | -          | AZT       |                                                                                                                                            |
| PBMCs           | Endogenous | -         | E36K, E89K, G93E, V108I, D186N                                                                                                             |
|                 | Endogenous | 3TC       | D17N, V21I, E28K, V35I, E36K, E40K, G51R, G93E, G93K, G99E, D110N, D113N, G152R, S163N                                                     |
|                 | Endogenous | AZT       | E28K, E29K, E36K, E40K, M41I, E44K, E53K, E79K, G93E, G93K, D110N, D113N, E122K, G152E, D185N, D186N, V189I, D192N, R211K, G231S           |
|                 | Endogenous | Mixed ARV | V21I, E36K, E40K, E44K, G51R, G93R, D110N, D113N, G152R, G155R, G196R, G213R, G231S, D237N                                                 |
| <b>VIRUS</b>    |            |           | Codon changes occurred at 1.5% frequency or higher                                                                                         |
| U87             | -          | -         | A33T, G93K, D110N, G112N, D113N, E122K, G141E, R143K, V179I, G231D, E233K, D237N                                                           |
|                 | -          | 3TC       | G93E, D110N, R143K, G152E, G155K, E224K, D237N                                                                                             |
|                 | -          | Mixed ARV | G93K, G141E, R143K, G213K                                                                                                                  |
|                 | A3F/A3G    | -         | G93K, D110N, D113N, V148I, G155K, S163N, G231D, E233K, D237N                                                                               |
|                 | A3F/A3G    | 3TC       | G231D                                                                                                                                      |
|                 | A3F/A3G    | AZT       | M41I, G93K, G112S, R143K, V179I, G231D                                                                                                     |
|                 | A3F/A3G    | Mixed ARV | G93K, G231D                                                                                                                                |
| CEM             | Endogenous | -         | E44K, G93K, G152E, G155K, G231N                                                                                                            |
|                 | Endogenous | 3TC       | E28K, A33T, E42K, G93K, R143K, G231D                                                                                                       |
|                 | Endogenous | AZT       | E53K, A98T, V179I                                                                                                                          |
| CEM-SS          | -          | -         | G93K, G99E, D110N, D113N, G213K, E224K, G231D                                                                                              |
|                 | -          | 3TC       | G93R, D113N                                                                                                                                |
|                 | -          | AZT       | G93K                                                                                                                                       |
| PBMCs           | Endogenous | -         | A33T, E44K, G93K, G93E, G99E, R143K, G213K                                                                                                 |
|                 | Endogenous | 3TC       | A33T, E44K, E89K, G93R, S163N                                                                                                              |
|                 | Endogenous | AZT       | G93R, G93K, D110N, E122K, V179I, R211K, E233K                                                                                              |
|                 | Endogenous | Mixed ARV | E89K, G93K, A98T, G99R, V106I, D110N, V111I, E122K, G152E, E169K, R172K, D177N, V179I, D185N, D192N                                        |
