# Supplementary material for: Role of co-expressed APOBEC3F and APOBEC3G in inducing HIV-1 drug resistance
Source: PubMed Central journal article supplement — Heliyon. 2019 Apr 16;5(4):e01498. doi: 10.1016/j.heliyon.2019.e01498 (PMC6475876; doi:10.1016/j.heliyon.2019.e01498), 2019-04-16
Supplement: mmc2.pdf [file mmc2.pdf]

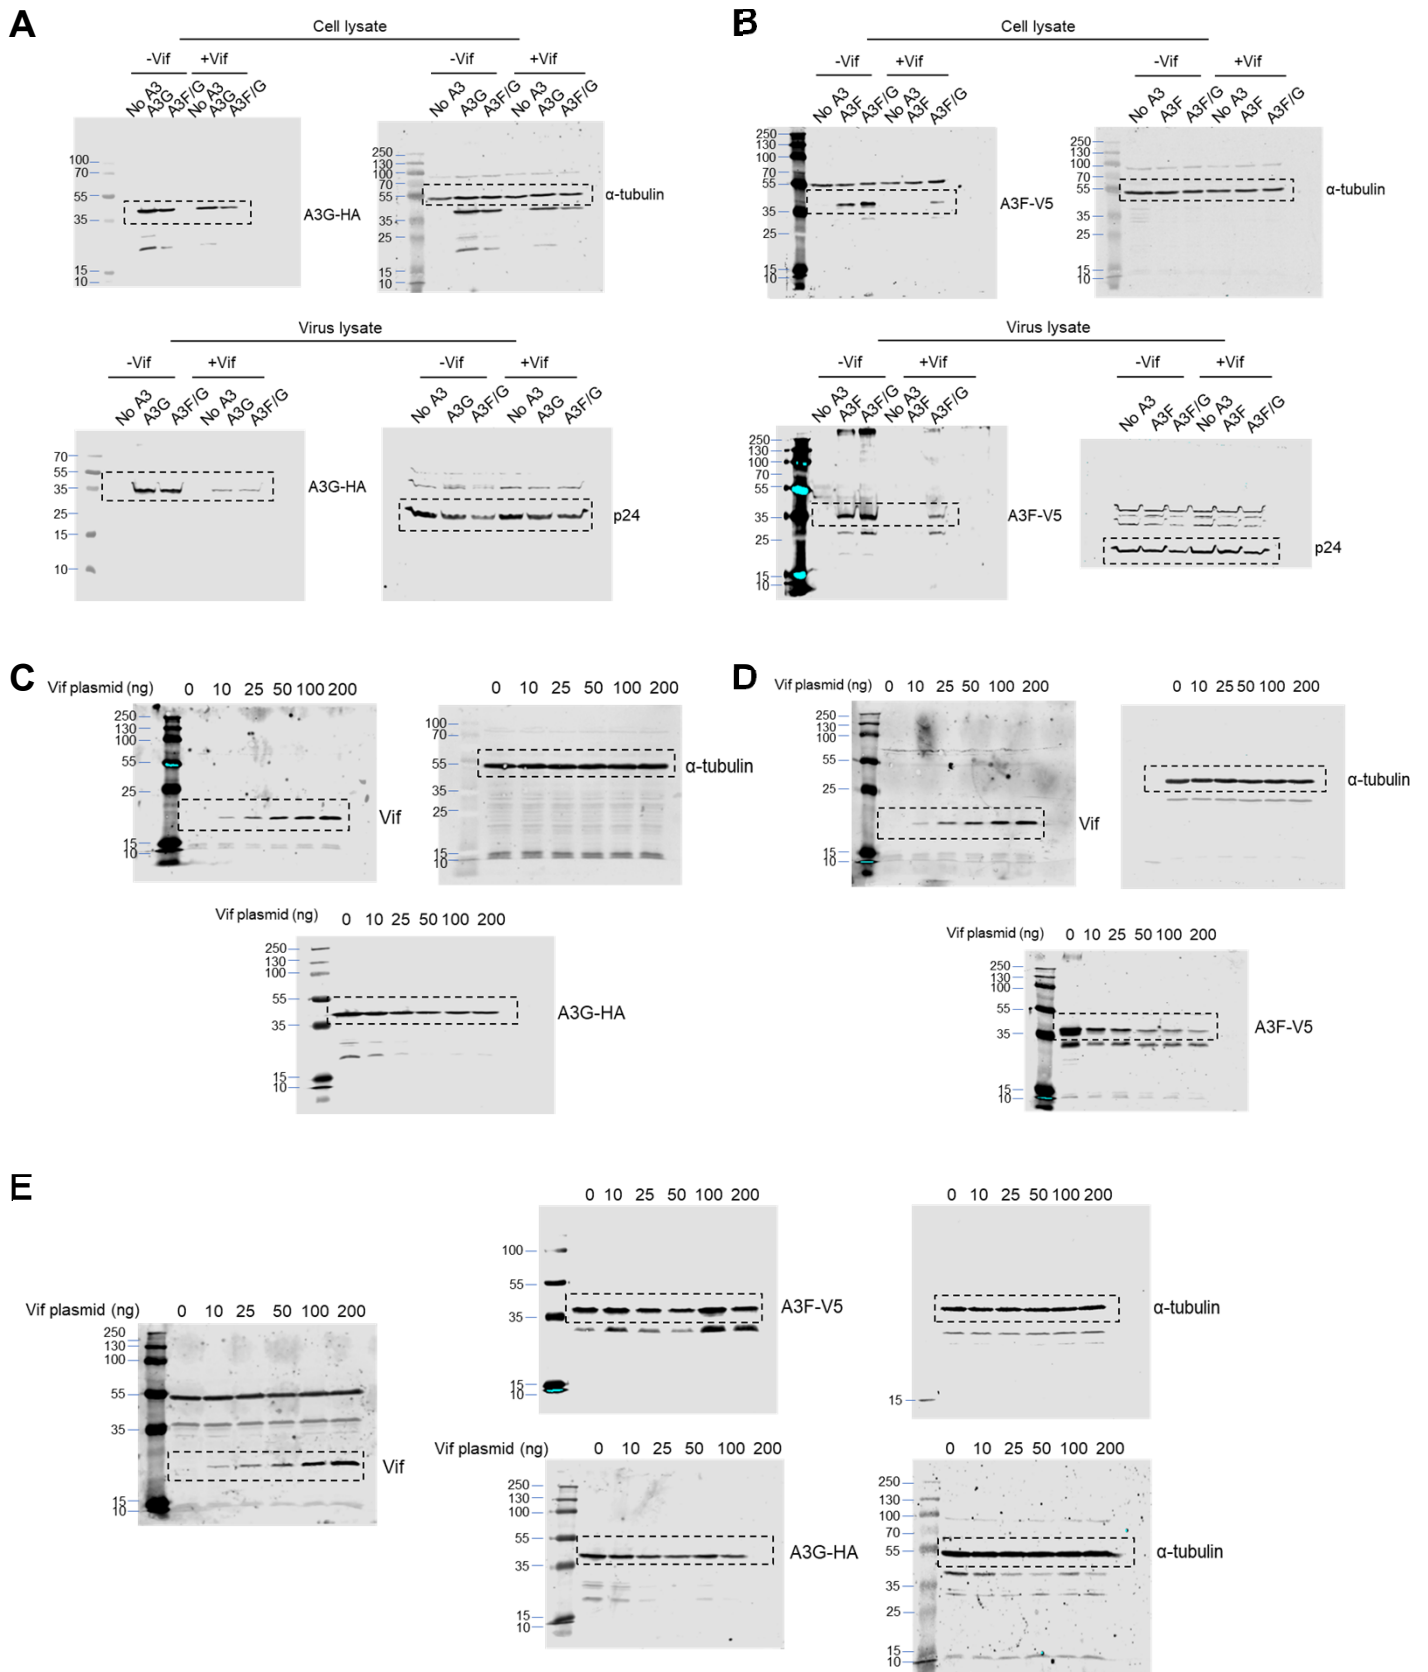

**Supplementary Figure S1.** Immunoblots displayed in Figure 1. Full size of immunoblots cropped for display in Figure 1 are shown as (A) Figure 1C, (B) Figure 1D, (C) Figure 1E, (D) Figure 1F, (E) Figure 1G. Dotted lines outline where the immunoblot was cropped. The molecular weight marker is labeled as kilodaltons.
